# Supplementary material
Source: PubMed Central journal article supplement (PMC3899819)
Supplement: supp_141.3.674_DEV100107.pdf [file supp_141.3.674_DEV100107.pdf]

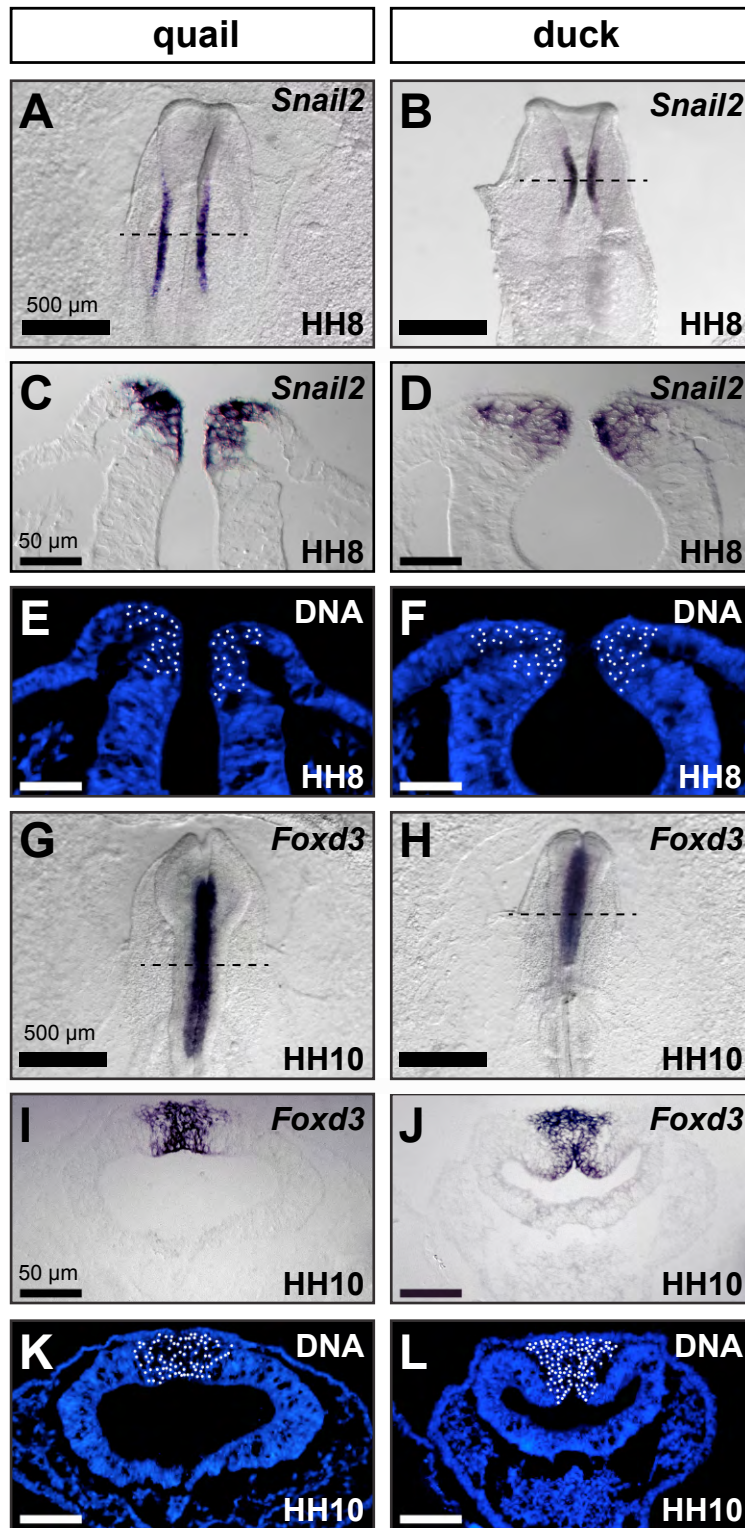

**Supplementary Fig. 1: *Snail2* and *FoxD3* expression.** ISH for *Snail2* in HH8 (A,C) quail and (B,D) duck embryos. Cross-sections of (E) quail and (F) duck *Snail2* ISH embryos counter-stained to identify cell nuclei. ISH for *FoxD3* in HH10 (G,I) quail and (H,J) duck embryos. Cross-sections of (K) quail and (L) duck *FoxD3* ISH embryos counter-stained to identify cell nuclei.
